# Supplementary material for: Association between whole grain food intake in Canada and nutrient intake, food group intake and diet quality: Findings from the 2015 Canadian Community Health Survey
Source: PubMed Central journal article supplement (PMC8248641; doi:10.1371/journal.pone.0253052), 2021-07-01
Supplement: pone.0253052.s001.pdf [file pone.0253052.s001.pdf]

**S1 Table. Individual Food Codes That Included the Term “Whole Wheat,” “Whole Grain,” or “Wholemeal” That Were Not Assigned to a Canada Food Guide (CFG) Food Group.**

| <b>Individual Food Codes that included the term “whole wheat” that were not assigned to a Canada Food Guide (CFG) food group<sup>a</sup></b> | <b>Number of CCHS 2015 participants that reported consuming this food on their day 1 24hr dietary recall</b> |
|----------------------------------------------------------------------------------------------------------------------------------------------|--------------------------------------------------------------------------------------------------------------|
| Spaghetti, cooked, whole wheat, fat added in cooking                                                                                         | 4                                                                                                            |
| Spaghetti, cooked, whole wheat, NS as to fat added in cooking                                                                                | 1                                                                                                            |
| Macaroni, whole wheat, cooked, fat added in cooking                                                                                          | 8                                                                                                            |
| Macaroni, whole wheat, cooked, NS as to fat added in cooking                                                                                 | 0                                                                                                            |
| Spaghetti with tomato sauce and meatballs or spaghetti with meat sauce and/or meatballs, whole wheat noodles                                 | 22                                                                                                           |
| Spaghetti with tomato sauce, meatless, whole wheat noodles                                                                                   | 10                                                                                                           |
| Lasagna with meat, whole wheat noodles                                                                                                       | 0                                                                                                            |
| Lasagna, meatless, whole wheat noodles                                                                                                       | 0                                                                                                            |

Data are from the Canadian Community Health Survey (CCHS) 2015.

<sup>a</sup>We also searched for the terms “whole grain” and “wholemeal” but found no foods that were not already assigned to a Canada Food Group Food Group that contained these terms in their description.
