# Supplementary material for: Association between whole grain food intake in Canada and nutrient intake, food group intake and diet quality: Findings from the 2015 Canadian Community Health Survey
Source: PubMed Central journal article supplement (PMC8248641; doi:10.1371/journal.pone.0253052), 2021-07-01
Supplement: pone.0253052.s002.pdf [file pone.0253052.s002.pdf]

**S2 Table. Food Groups Used in the Current Study Based on Canada Food Guide Food Groups and Tiers.**

| <b>Food Group Categories</b>              | <b>CCHS CFG Food Groups</b>                                                                                                                                                                          |
|-------------------------------------------|------------------------------------------------------------------------------------------------------------------------------------------------------------------------------------------------------|
| Whole Grains Tier 1-3                     | - Grains – whole tier 1-3                                                                                                                                                                            |
| Whole Grains Tier 4                       | - Grains – whole tier 4                                                                                                                                                                              |
| Fruit Tier 1-3                            | - Fruit other than juice tiers 1-3<br>- Fruit juice tiers 2 & 3                                                                                                                                      |
| Fruit Tier 4                              | - Fruit other than juice tier 4                                                                                                                                                                      |
| Vegetables tiers 1-3                      | - Vegetables – dark green tiers 1 -3<br>- Vegetables – deep yellow/orange tiers 1-3<br>- Vegetables – potatoes tiers 1-3<br>- Vegetables – other tiers 1-3<br>- Vegetable juice cocktail tiers 2 & 3 |
| Vegetables tiers 4                        | - Vegetables – potatoes tier 4<br>- Vegetables – other tier 4                                                                                                                                        |
| Refined grains tiers 1-3                  | - Grain products – non whole, enriched tiers 1-3<br>- Grain products, non whole nonenriched tiers 1-3                                                                                                |
| Refined grains tier 4                     | - Grain products – non whole, enriched tier 4<br>- Grain products – non whole non enriched tier 4                                                                                                    |
| Dairy products and alternatives tiers 1-3 | - Fluid milk and fortified soy-based products tiers 1-3<br>- Other milk alternatives – cheese/yogurt tiers 1-3                                                                                       |
| Dairy products and alternatives tier 4    | - Other milk alternatives – cheese/yogurt tier 4                                                                                                                                                     |
| Meat and poultry tiers 1-3                | - Meat – beef/game/organ tiers 1-3<br>- Meat other pork/veal/lamb tiers 1-3<br>- Poultry tiers 1-3                                                                                                   |
| Meat and poultry tier 4                   | - Meat – beef/game/organ tier 4<br>- Meat other pork/veal/lamb tier 4<br>- Poultry tier 4                                                                                                            |
| Processed meats tiers 1-3                 | - Processed meats tiers 1-3                                                                                                                                                                          |
| Processed meat tier 4                     | - Processed meat tier 4                                                                                                                                                                              |
| Fish and Shellfish tiers 1-3              | - Fish tiers 1-3                                                                                                                                                                                     |

| Food Group Categories             | CCHS CFG Food Groups                                                                                                                                                                                                        |
|-----------------------------------|-----------------------------------------------------------------------------------------------------------------------------------------------------------------------------------------------------------------------------|
|                                   | <ul style="list-style-type: none"> <li>- Shellfish tiers 1-3</li> </ul>                                                                                                                                                     |
| Fish and Shellfish tier 4         | <ul style="list-style-type: none"> <li>- Fish tier 4</li> <li>- Shellfish tier 4</li> </ul>                                                                                                                                 |
| Legumes, nuts and seeds tiers 1-3 | <ul style="list-style-type: none"> <li>- Legumes tiers 1-3</li> <li>- Nuts and seeds tiers 1-3</li> </ul>                                                                                                                   |
| Legumes, nuts and seeds tier 4    | <ul style="list-style-type: none"> <li>- Legumes tier 4</li> </ul>                                                                                                                                                          |
| Eggs tiers 1-3                    | <ul style="list-style-type: none"> <li>- Eggs tiers 1-3</li> </ul>                                                                                                                                                          |
| Eggs tier 4                       | <ul style="list-style-type: none"> <li>- Eggs tier 4</li> </ul>                                                                                                                                                             |
| No CFG –discretionary foods       | <ul style="list-style-type: none"> <li>- Saturated and/or trans fat</li> <li>- Beverages high in calories</li> <li>- Alcoholic beverages</li> <li>- High fat/high sugar foods</li> </ul>                                    |
| NoCFG – other foods and recipes   | <ul style="list-style-type: none"> <li>- Beverages low in calories</li> <li>- Meal replacements</li> <li>- Supplements e.g. energy bars</li> <li>- Unsaturated fats and oils</li> <li>- Water</li> <li>- Recipes</li> </ul> |
| NoCFG – foods not classified      | <ul style="list-style-type: none"> <li>- Uncategorized ingredients</li> <li>- Not stated</li> </ul>                                                                                                                         |
