# Supplementary material for: Association between whole grain food intake in Canada and nutrient intake, food group intake and diet quality: Findings from the 2015 Canadian Community Health Survey
Source: PubMed Central journal article supplement (PMC8248641; doi:10.1371/journal.pone.0253052), 2021-07-01
Supplement: pone.0253052.s003.pdf [file pone.0253052.s003.pdf]

**S3 Table. Health Canada Daily Values for Nutrients Included in the Calculation of the Nutrient Rich Food Index 9.3.**

| Nutrients included in the Nutrient Rich Food Index (NRF) 9.3 | Daily Recommendation Based on Health Canada Daily Values used for Nutrition Labelling <sup>a</sup> |
|--------------------------------------------------------------|----------------------------------------------------------------------------------------------------|
| Protein                                                      | 50 g                                                                                               |
| Fiber                                                        | 28 g                                                                                               |
| Calcium                                                      | 1300 mg                                                                                            |
| Vitamin A                                                    | 900 µg RAE                                                                                         |
| Vitamin C                                                    | 90 mg                                                                                              |
| Vitamin D                                                    | 20 µg                                                                                              |
| Iron                                                         | 18 mg                                                                                              |
| Potassium                                                    | 4700 mg                                                                                            |
| Magnesium                                                    | 420 mg                                                                                             |
| Total sugar                                                  | 100 g                                                                                              |
| Saturated fat                                                | 20 g                                                                                               |
| Sodium                                                       | 2300 mg                                                                                            |

<sup>a</sup> <https://www.canada.ca/en/health-canada/services/technical-documents-labelling-requirements/table-daily-values/nutrition-labelling.html>
