# Supplementary material for: Association between whole grain food intake in Canada and nutrient intake, food group intake and diet quality: Findings from the 2015 Canadian Community Health Survey
Source: PubMed Central journal article supplement (PMC8248641; doi:10.1371/journal.pone.0253052), 2021-07-01
Supplement: pone.0253052.s004.pdf [file pone.0253052.s004.pdf]

**S4 Table. Unadjusted Daily Nutrient Intakes for Canadian Children and Adults Stratified by Whole Grain Food Intake.**

|                              | No Whole Grain Food Intake (No-WG) <sup>a</sup> |                   | Low Whole Grain Food Intake (Low-WG) <sup>a</sup> |                   | Mid-Whole Grain Food Intake (Mid-WG) <sup>a</sup> |                   | High-Whole Grain Food Intake (High-WG) <sup>a</sup> |                   | p value for linear trend <sup>b</sup> |         |
|------------------------------|-------------------------------------------------|-------------------|---------------------------------------------------|-------------------|---------------------------------------------------|-------------------|-----------------------------------------------------|-------------------|---------------------------------------|---------|
|                              | Children<br>n=3,305                             | Adults<br>n=7,578 | Children<br>n=1,077                               | Adults<br>n=2,044 | Children<br>n=1,085                               | Adults<br>n=2,156 | Children<br>n=1,101                                 | Adults<br>n=2,141 | Children                              | Adults  |
| Energy, kcal                 | 1809 ± 23                                       | 1878 ± 30         | 1604 ± 39                                         | 1749 ± 35         | 1772 ± 46                                         | 1896 ± 37         | 2006 ± 49                                           | 1978 ± 38         | 0.0004                                | 0.2     |
| Carbohydrates, g             | 239.0 ± 3.3                                     | 217.8 ± 2.4       | 212.9 ± 5.2                                       | 209.1 ± 3.6       | 241.7 ± 6.7                                       | 224.6 ± 5.7       | 273.7 ± 5.9                                         | 252.7 ± 6.2       | <0.0001                               | 0.0002  |
| Carbohydrates, % of energy   | 52.7 ± 0.4                                      | 46.8 ± 0.6        | 53.1 ± 0.5                                        | 47.6 ± 1.0        | 54.2 ± 0.5                                        | 47.7 ± 0.7        | 54.8 ± 0.4                                          | 51.4 ± 0.8        | <0.0001                               | <0.0001 |
| Total sugar, g               | 106.8 ± 2.3                                     | 87.1 ± 1.3        | 99.4 ± 2.7                                        | 85.4 ± 2.1        | 108.9 ± 3.7                                       | 85.8 ± 3.3        | 112.6 ± 3.2                                         | 89.3 ± 2.9        | 0.1                                   | 0.7     |
| Fiber, g                     | 13.3 ± 0.2                                      | 14.7 ± 0.2        | 12.9 ± 0.3                                        | 17.4 ± 0.7        | 16.2 ± 0.4                                        | 19.2 ± 0.3        | 21.2 ± 0.4                                          | 24.8 ± 1.2        | <0.0001                               | <0.0001 |
| Total fat, g                 | 65.5 ± 1.0                                      | 70.9 ± 1.7        | 56.9 ± 1.8                                        | 64.6 ± 1.8        | 62.0 ± 1.9                                        | 71.8 ± 1.8        | 68.6 ± 2.2                                          | 69.2 ± 1.7        | 0.6                                   | 0.6     |
| Total fat, % of energy       | 31.6 ± 0.3                                      | 32.6 ± 0.4        | 31.0 ± 0.4                                        | 32.1 ± 0.7        | 30.5 ± 0.5                                        | 32.4 ± 0.5        | 29.3 ± 0.4                                          | 29.9 ± 0.6        | <0.0001                               | <0.0001 |
| Saturated fat, g             | 23.5 ± 0.5                                      | 23.3 ± 0.8        | 21.1 ± 0.7                                        | 21.0 ± 0.5        | 22.0 ± 0.8                                        | 23.1 ± 0.6        | 24.3 ± 0.8                                          | 21.9 ± 0.6        | 0.9                                   | 0.3     |
| Protein, g                   | 70.5 ± 1.2                                      | 79.2 ± 1.0        | 64.6 ± 2.3                                        | 75.3 ± 2.2        | 67.6 ± 2.3                                        | 80.5 ± 1.9        | 79.7 ± 2.6                                          | 83.2 ± 1.8        | 0.007                                 | 0.07    |
| Protein, % of energy         | 15.6 ± 0.2                                      | 17.0 ± 0.2        | 15.9 ± 0.4                                        | 17.3 ± 0.2        | 15.3 ± 0.3                                        | 17.0 ± 0.2        | 15.8 ± 0.2                                          | 16.8 ± 0.2        | 1.0                                   | 0.6     |
| Vitamin B <sub>12</sub> , µg | 4.0 ± 0.2                                       | 4.1 ± 0.2         | 3.7 ± 0.1                                         | 4.3 ± 0.5         | 3.6 ± 0.2                                         | 4.0 ± 0.2         | 4.0 ± 0.2                                           | 3.8 ± 0.4         | 0.5                                   | 0.6     |
| Vitamin B <sub>6</sub> , µg  | 1.4 ± 0.0                                       | 1.6 ± 0.0         | 1.3 ± 0.1                                         | 1.6 ± 0.0         | 1.4 ± 0.1                                         | 1.7 ± 0.0         | 1.7 ± 0.1                                           | 1.9 ± 0.1         | <0.0001                               | 0.003   |
| Vitamin C, mg                | 114.5 ± 3.8                                     | 94.6 ± 2.6        | 108.1 ± 5.9                                       | 95.6 ± 3.4        | 114.8 ± 10.7                                      | 104.3 ± 4.2       | 116.4 ± 4.8                                         | 106.8 ± 4.4       | 0.8                                   | 0.02    |
| Folate, µg                   | 443.3 ± 9.5                                     | 454.6 ± 7.5       | 391.9 ± 18.4                                      | 416.3 ± 10.3      | 386.8 ± 13.2                                      | 421.3 ± 10.1      | 431.4 ± 14.4                                        | 434.0 ± 14.1      | 0.06                                  | 0.01    |
| Folic acid, µg               | 140.6 ± 3.8                                     | 124.6 ± 2.4       | 126.0 ± 8.4                                       | 103.8 ± 3.4       | 111.6 ± 4.9                                       | 96.4 ± 4.2        | 120.8 ± 6.3                                         | 86.4 ± 3.7        | 0.0001                                | <0.0001 |

|                                 |                  |                  |                  |                  |                  |                  |                   |                  |         |         |
|---------------------------------|------------------|------------------|------------------|------------------|------------------|------------------|-------------------|------------------|---------|---------|
| Vitamin D, $\mu\text{g}$        | 5.3 $\pm$ 0.2    | 4.5 $\pm$ 0.2    | 6.0 $\pm$ 0.3    | 4.8 $\pm$ 0.3    | 5.6 $\pm$ 0.2    | 5.1 $\pm$ 0.2    | 6.1 $\pm$ 0.3     | 5.1 $\pm$ 0.3    | 0.02    | 0.02    |
| Niacin, mg                      | 33.5 $\pm$ 0.6   | 39.3 $\pm$ 0.5   | 29.6 $\pm$ 1.2   | 37.0 $\pm$ 1.1   | 31.3 $\pm$ 1.2   | 39.6 $\pm$ 1.3   | 37.8 $\pm$ 1.4    | 40.6 $\pm$ 1.1   | 0.02    | 0.4     |
| Vitamin A, $\mu\text{g}$<br>RAE | 600.9 $\pm$ 21.6 | 620.0 $\pm$ 35.7 | 613.7 $\pm$ 29.9 | 697.0 $\pm$ 48.4 | 592.5 $\pm$ 21.1 | 694.4 $\pm$ 24.8 | 627.3 $\pm$ 37.2  | 690.1 $\pm$ 26.3 | 0.6     | 0.2     |
| Riboflavin, mg                  | 1.8 $\pm$ 0.0    | 1.9 $\pm$ 0.0    | 1.8 $\pm$ 0.0    | 1.9 $\pm$ 0.1    | 1.8 $\pm$ 0.1    | 1.9 $\pm$ 0.0    | 1.9 $\pm$ 0.1     | 2.0 $\pm$ 0.0    | 0.6     | 0.6     |
| Thiamin, mg                     | 1.6 $\pm$ 0.0    | 1.5 $\pm$ 0.0    | 1.4 $\pm$ 0.0    | 1.5 $\pm$ 0.0    | 1.5 $\pm$ 0.1    | 1.6 $\pm$ 0.0    | 1.9 $\pm$ 0.1     | 1.8 $\pm$ 0.0    | 0.009   | <0.0001 |
| Sodium, mg                      | 2561 $\pm$ 43    | 2760 $\pm$ 51    | 2216 $\pm$ 54    | 2509 $\pm$ 55    | 2408 $\pm$ 73    | 2703 $\pm$ 88    | 2760 $\pm$ 68     | 2866 $\pm$ 106   | 0.2     | 0.5     |
| Potassium, mg                   | 2332 $\pm$ 32    | 2593 $\pm$ 28    | 2212 $\pm$ 52    | 2662 $\pm$ 49    | 2396 $\pm$ 81    | 2784 $\pm$ 45    | 2670 $\pm$ 66     | 2960 $\pm$ 58    | <0.0001 | <0.0001 |
| Zinc, mg                        | 9.1 $\pm$ 0.2    | 10.2 $\pm$ 0.2   | 8.4 $\pm$ 0.3    | 10.2 $\pm$ 0.6   | 8.9 $\pm$ 0.4    | 10.8 $\pm$ 0.4   | 10.8 $\pm$ 0.4    | 11.7 $\pm$ 0.3   | 0.0004  | <0.0001 |
| Calcium, mg                     | 902.6 $\pm$ 23.0 | 754.1 $\pm$ 16.6 | 965.9 $\pm$ 24.8 | 799.4 $\pm$ 27.6 | 963.9 $\pm$ 31.6 | 818.3 $\pm$ 19.8 | 1071.1 $\pm$ 49.6 | 852.4 $\pm$ 22.5 | <0.0001 | <0.0001 |
| Iron, mg                        | 11.5 $\pm$ 0.2   | 11.8 $\pm$ 0.1   | 11.0 $\pm$ 0.3   | 12.2 $\pm$ 0.4   | 11.8 $\pm$ 0.5   | 12.8 $\pm$ 0.4   | 14.4 $\pm$ 0.5    | 14.1 $\pm$ 0.3   | <0.0001 | <0.0001 |
| Magnesium, mg                   | 236.1 $\pm$ 3.4  | 280.9 $\pm$ 3.9  | 231.0 $\pm$ 7.3  | 302.3 $\pm$ 9.7  | 262.4 $\pm$ 7.1  | 335.0 $\pm$ 6.8  | 330.8 $\pm$ 8.2   | 388.7 $\pm$ 7.8  | <0.0001 | <0.0001 |

RAE, retinol activity equivalents. Data are based on the Canadian Community Health Survey (CCHS) 2015 and are presented as mean  $\pm$  standard error. Results are unadjusted.

<sup>a</sup>CCHS 2015 respondents were stratified according to whole grain intake: those in the “no whole grain intake” (No-WG) group reported consuming no whole grain foods on a single 24-hour dietary recall. The remaining participants that consumed whole grains were divided according to age-specific tertiles into low- middle- and high-whole grain foods intake (low-WG, mid-WG, high-WG).

<sup>b</sup>Statistical significance was determined based on linear trends across whole grain intake groups for children and adults (separately) and a  $p < 0.002$ , after applying a Bonferroni correction for multiple comparisons ( $0.05/22$  nutrients = 0.00227), was considered statistically significant.
