# Supplementary material for: Association between whole grain food intake in Canada and nutrient intake, food group intake and diet quality: Findings from the 2015 Canadian Community Health Survey
Source: PubMed Central journal article supplement (PMC8248641; doi:10.1371/journal.pone.0253052), 2021-07-01
Supplement: pone.0253052.s007.pdf [file pone.0253052.s007.pdf]

**S7 Table. Unadjusted Canadian Food Guide Food Group Intake for Children and Adults Stratified by Whole Grain Food Intake.**

| Food Groups by Canada Food Guide Tiers <sup>c</sup> | No Whole Grain Food Intake (No-WG) <sup>a</sup> |                   | Low Whole Grain Food Intake (Low-WG) <sup>a</sup> |                   | Mid-Whole Grain Food Intake (Mid-WG) <sup>a</sup> |                   | High-Whole Grain Food Intake (High-WG) <sup>a</sup> |                   | p value for linear trend <sup>b</sup> |         |
|-----------------------------------------------------|-------------------------------------------------|-------------------|---------------------------------------------------|-------------------|---------------------------------------------------|-------------------|-----------------------------------------------------|-------------------|---------------------------------------|---------|
|                                                     | Children<br>n=3,305                             | Adults<br>n=7,578 | Children<br>n=1,077                               | Adults<br>n=2,044 | Children<br>n=1,085                               | Adults<br>n=2,156 | Children<br>n=1,101                                 | Adults<br>n=2,141 | Children                              | Adults  |
| Whole Grains Tier 1-3, g/d                          | 0 ± 0                                           | 0 ± 0             | 18 ± 1                                            | 27 ± 1            | 52 ± 1                                            | 69 ± 1            | 156 ± 6                                             | 216 ± 12          | <0.0001                               | <0.0001 |
| Whole Grains Tier 4, g/d                            | 0 ± 0                                           | 0 ± 0             | 2 ± 0                                             | 2 ± 0             | 3 ± 0                                             | 3 ± 0             | 7 ± 1                                               | 4 ± 1             | <0.0001                               | <0.0001 |
| Fruit CFG tiers 1-3, g/d                            | 274 ± 9                                         | 196 ± 5           | 274 ± 13                                          | 217 ± 9           | 308 ± 24                                          | 235 ± 10          | 311 ± 17                                            | 243 ± 11          | 0.01                                  | <0.0001 |
| Fruit CFG tier 4, g/d                               | 0 ± 0                                           | 0 ± 0             | 0 ± 0                                             | 0 ± 0             | 0 ± 0                                             | 0 ± 0             | 0 ± 0                                               | 0 ± 0             | 1.0                                   | 0.9     |
| Vegetables CFG tiers 1-3, g/d                       | 150 ± 4                                         | 219 ± 8           | 131 ± 11                                          | 220 ± 8           | 135 ± 11                                          | 228 ± 8           | 152 ± 6                                             | 239 ± 15          | 0.6                                   | 0.3     |
| Vegetables CFG tier 4, g/d                          | 3 ± 0                                           | 4 ± 1             | 2 ± 0                                             | 4 ± 1             | 2 ± 1                                             | 5 ± 1             | 4 ± 2                                               | 2 ± 1             | 0.7                                   | 0.3     |
| Refined grains CFG tiers 1-3, g/d                   | 199 ± 5                                         | 186 ± 7           | 153 ± 7                                           | 145 ± 5           | 144 ± 11                                          | 127 ± 13          | 145 ± 7                                             | 122 ± 4           | <0.0001                               | <0.0001 |
| Refined grains CFG tier 4, g/d                      | 42 ± 4                                          | 23 ± 1            | 35 ± 4                                            | 19 ± 6            | 32 ± 5                                            | 23 ± 2            | 26 ± 4                                              | 19 ± 2            | 0.003                                 | 0.1     |
| Dairy products and alternatives CFG tiers 1-3, g/d  | 348 ± 18                                        | 197 ± 7           | 427 ± 16                                          | 240 ± 9           | 408 ± 18                                          | 237 ± 11          | 403 ± 27                                            | 238 ± 13          | 0.007                                 | 0.0008  |
| Dairy products and alternatives CFG tier 4, g/d     | 6 ± 1                                           | 6 ± 1             | 5 ± 1                                             | 5 ± 1             | 6 ± 1                                             | 4 ± 1             | 4 ± 1                                               | 5 ± 1             | 0.2                                   | 0.07    |
| Meat and poultry CFG tiers 1-3, g/d                 | 64 ± 3                                          | 86 ± 4            | 53 ± 6                                            | 81 ± 4            | 48 ± 5                                            | 80 ± 5            | 63 ± 6                                              | 73 ± 4            | 0.2                                   | 0.005   |
| Meat and poultry CFG tier 4, g/d                    | 8 ± 1                                           | 13 ± 3            | 4 ± 2                                             | 6 ± 1             | 6 ± 3                                             | 6 ± 2             | 5 ± 2                                               | 7 ± 2             | 0.1                                   | 0.003   |
| Processed meats CFG tiers 1-3, g/d                  | 12 ± 1                                          | 12 ± 1            | 9 ± 2                                             | 10 ± 1            | 12 ± 2                                            | 12 ± 1            | 13 ± 2                                              | 14 ± 2            | 0.8                                   | 0.3     |
| Processed meats CFG tier 4, g/d                     | 10 ± 1                                          | 11 ± 1            | 11 ± 1                                            | 6 ± 1             | 11 ± 2                                            | 9 ± 3             | 8 ± 1                                               | 5 ± 1             | 0.3                                   | 0.01    |

| Food Groups by Canada Food Guide Tiers <sup>c</sup> | No Whole Grain Food Intake (No-WG) <sup>a</sup> |                   | Low Whole Grain Food Intake (Low-WG) <sup>a</sup> |                   | Mid-Whole Grain Food Intake (Mid-WG) <sup>a</sup> |                   | High-Whole Grain Food Intake (High-WG) <sup>a</sup> |                   | p value for linear trend <sup>b</sup> |         |
|-----------------------------------------------------|-------------------------------------------------|-------------------|---------------------------------------------------|-------------------|---------------------------------------------------|-------------------|-----------------------------------------------------|-------------------|---------------------------------------|---------|
|                                                     | Children<br>n=3,305                             | Adults<br>n=7,578 | Children<br>n=1,077                               | Adults<br>n=2,044 | Children<br>n=1,085                               | Adults<br>n=2,156 | Children<br>n=1,101                                 | Adults<br>n=2,141 | Children                              | Adults  |
| Fish and shellfish CFG tiers 1-3, g/d               | 10 ± 1                                          | 15 ± 2            | 8 ± 2                                             | 19 ± 4            | 8 ± 1                                             | 18 ± 3            | 11 ± 2                                              | 17 ± 3            | 0.8                                   | 0.2     |
| Fish and shellfish CFG tier 4, g/d                  | 1 ± 0                                           | 4 ± 1             | 1 ± 0                                             | 3 ± 1             | 0 ± 0                                             | 4 ± 2             | 2 ± 1                                               | 2 ± 1             | 0.5                                   | 0.2     |
| Legumes, nuts and seeds CFG tiers 1-3, g/d          | 13 ± 1                                          | 22 ± 1            | 9 ± 1                                             | 31 ± 5            | 18 ± 3                                            | 28 ± 3            | 18 ± 2                                              | 39 ± 3            | 0.03                                  | <0.0001 |
| Legumes, nuts and seeds CFG tier 4, g/d             | 1 ± 0                                           | 1 ± 0             | 0 ± 0                                             | 3 ± 1             | 1 ± 0                                             | 1 ± 1             | 1 ± 0                                               | 2 ± 1             | 0.9                                   | 0.3     |
| Eggs CFG tiers 1-3, g/d                             | 14 ± 1                                          | 22 ± 1            | 13 ± 2                                            | 20 ± 2            | 14 ± 2                                            | 26 ± 2            | 13 ± 2                                              | 23 ± 2            | 1.0                                   | 0.2     |
| Eggs CFG tier 4, g/d                                | 0 ± 0                                           | 1 ± 0             | 0 ± 0                                             | 0 ± 0             | 0 ± 0                                             | 1 ± 0             | 0 ± 0                                               | 0 ± 0             | 0.8                                   | 0.3     |
| No CFG - Discretionary foods, g/d                   | 181 ± 10                                        | 335 ± 15          | 106 ± 12                                          | 226 ± 14          | 142 ± 15                                          | 244 ± 19          | 155 ± 11                                            | 198 ± 13          | 0.04                                  | <0.0001 |
| No CFG - Other foods and recipes, g/d               | 770 ± 21                                        | 1468 ± 26         | 655 ± 24                                          | 1535 ± 54         | 741 ± 45                                          | 1594 ± 58         | 883 ± 44                                            | 1601 ± 77         | 0.09                                  | 0.1     |
| No CRF – Foods not classified, g/d                  | 573 ± 12                                        | 717 ± 10          | 507 ± 22                                          | 706 ± 19          | 567 ± 24                                          | 737 ± 31          | 599 ± 21                                            | 761 ± 28          | 0.4                                   | 0.05    |

CFG, Canada Food Guide; WG, whole grains. Data are based on the Canadian Community Health Survey (CCHS) 2015 and are presented as mean ± standard error. The results are unadjusted. The units for all results are in grams.

<sup>a</sup>CCHS 2015 respondents were stratified according to whole grain intake: those in the “no whole grain intake” (No-WG) group reported consuming no whole grain foods on a single 24-hour dietary recall. The remaining participants that consumed whole grains were divided according to age- and sex-specific tertiles into low- middle- and high-whole grain foods intake (low-WG, mid-WG, high-WG).

<sup>b</sup>Statistical significance was determined across whole grain intake groups for children and adults (separately) and a p<0.002, after applying a Bonferroni correction for multiple comparisons (0.05/24 food groups = 0.00208), was considered statistically significant.

<sup>c</sup>The four tiers indicate whether a food item is aligned (tiers 1 & 2), partially aligned (tier 3) or not aligned (tier 4) with the 2007 Canadian Food Guide.
